# Supplementary material
Source: Springer Nature journal article supplement (https://www.springermedizin.de/resource/supplementary/12879_2013_2696_MOESM1_ESM.pdf/9445152)
Supplement: MOESM1 [file 9445152]

Preliminary consultation

Health services identified

Eligibility confirmed &amp; health services invited to participate

Health services sign participation agreement

Background information gathering on health service context

Confirm data extraction processes with health services

Randomisation

Health services (Standard Practice Phase)

Year 1: 6 services

Year 2: 6 services

Health services (POC Phase)

Year 1: 6 services

Year 2: 6 services

**Consultation**Health services,  
communities,  
stakeholders**Implementation**

| Activity                                | Standard Practice Phase | POC Phase |
|-----------------------------------------|-------------------------|-----------|
| POC device installed                    |                         | ✓         |
| Reference laboratory testing maintained | ✓                       | ✓         |
| Training (POC machine)                  | ✓                       | ✓         |
| STI quality improvement                 | ✓                       | ✓         |
| Support (3 visits, phone)               | ✓                       | ✓         |
| Clinical performance incentives         | ✓                       | ✓         |
| Data extraction 3/12                    | ✓                       | ✓         |
| Data reports provided 6/12              | ✓                       | ✓         |
| Staff survey and interview              |                         | ✓         |
| Client acceptability survey             |                         | ✓         |

Analysis and final reporting
